# Supplementary material
Source: Springer Nature journal article supplement (https://www.springermedizin.de/resource/supplementary/13012_2009_217_MOESM2_ESM.pdf/9629546)

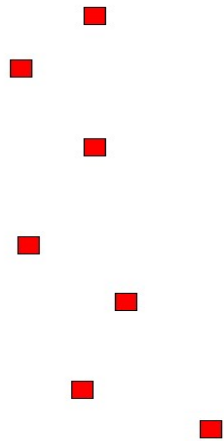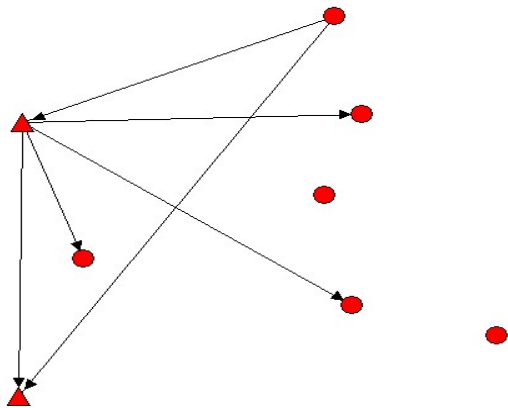

- = Practice assistant
- ▲ = Practice nurse
- = GP

Supplement: MOESM2 [file 9629546]
